# Supplementary material for: Impact of COVID-19 Restrictions on the Social-Emotional Wellbeing of Preschool Children and Their Families
Source: MDPI journal article supplement (doi:10.3390/educsci11080435), 2021-08-17
Supplement: s1 [file s1]

Archive with 2 entries (2 files):
- Questionnaire S2.pdf
- Table S1.pdf
