# Supplementary material for: Impact of COVID-19 Restrictions on the Social-Emotional Wellbeing of Preschool Children and Their Families
Source: MDPI journal article supplement (doi:10.3390/educsci11080435), 2021-08-17
Supplement: s1 [file s1 › Questionnaire S2.pdf]

## Questionnaire S2: The pandemic-related questionnaire

**How much has your child participated in early childhood education between 18 March and 13 May 2020?**

- Not at all ☐
- For 1 to 2 weeks ☐
- For 3 to 4 weeks ☐
- For 5 to 6 weeks ☐
- For 7 to 8 weeks ☐
- For the whole time, shorter than usual daily time ☐
- For the whole time, normal hours ☐

**Between 18 March and 13 May 2020 I have**

- worked all the time at my workplace ☐
- worked varyingly at home and at workplace ☐
- worked all the time at home ☐
- studied at home ☐
- been laid off due to pandemic situation ☐
- become unemployed due to pandemic situation ☐
- been at home for other reasons, please clarify ☐
- 

---

|                                                       | Not at all               | Less often<br>than before | As often as<br>before    | More often<br>than before | Much more<br>often than<br>before |
|-------------------------------------------------------|--------------------------|---------------------------|--------------------------|---------------------------|-----------------------------------|
| <b>During the exceptional period have you:</b>        |                          |                           |                          |                           |                                   |
| worried about the situation in general?               | <input type="checkbox"/> | <input type="checkbox"/>  | <input type="checkbox"/> | <input type="checkbox"/>  | <input type="checkbox"/>          |
| worried about your family's finances?                 | <input type="checkbox"/> | <input type="checkbox"/>  | <input type="checkbox"/> | <input type="checkbox"/>  | <input type="checkbox"/>          |
| been concerned about the future in<br>general?        | <input type="checkbox"/> | <input type="checkbox"/>  | <input type="checkbox"/> | <input type="checkbox"/>  | <input type="checkbox"/>          |
| feared that someone in your family would<br>get sick? | <input type="checkbox"/> | <input type="checkbox"/>  | <input type="checkbox"/> | <input type="checkbox"/>  | <input type="checkbox"/>          |
| feared that someone close would get sick?             | <input type="checkbox"/> | <input type="checkbox"/>  | <input type="checkbox"/> | <input type="checkbox"/>  | <input type="checkbox"/>          |
| felt depressed or low-spirited?                       | <input type="checkbox"/> | <input type="checkbox"/>  | <input type="checkbox"/> | <input type="checkbox"/>  | <input type="checkbox"/>          |

---

|                                        |                          |                          |                          |                          |                          |
|----------------------------------------|--------------------------|--------------------------|--------------------------|--------------------------|--------------------------|
| experienced work-related stress?       | <input type="checkbox"/> |
| experienced family-related stress?     | <input type="checkbox"/> |
| felt exhausted?                        | <input type="checkbox"/> |
| been well?                             | <input type="checkbox"/> |
| felt irritated by your family members? | <input type="checkbox"/> |

**During the exceptional period the financial situation of the family**

- has become much worse ☐
- has become a little worse ☐
- has remained the same as before ☐
- has become a little better ☐
- has become much better ☐

Do you think that the pandemic situation has changed your relationship with your child?

Yes ☐ No ☐

If you answered yes, describe how:

---



---

If you are in a marital relationship<sup>1</sup> do you think your relationship has changed during the pandemic situation?

Yes ☐ No ☐

If you answered yes, describe how:

---



---



---

<sup>1</sup> In both Swedish and Finnish there is a word referring to a relationship between a pair (parförhållande/parisuhde), whether they are married or not.
