# Supplementary material for: Impact of COVID-19 Restrictions on the Social-Emotional Wellbeing of Preschool Children and Their Families
Source: MDPI journal article supplement (doi:10.3390/educsci11080435), 2021-08-17
Supplement: s1 [file s1 › Table S1.pdf]

**Table S1** List of the responded questionnaires for each child. KINDL = Kiddy KINDL questionnaire (Ravens-Sieberer & Bullinger, 1998), SDQ = Strengths and Difficulties Questionnaire (Goodman, 2001).

| Children | KINDL | Pandemic questionnaire | SDQ spring 2020 | SDQ winter 2020 | Background questionnaire winter 2020 | Missing                     |
|----------|-------|------------------------|-----------------|-----------------|--------------------------------------|-----------------------------|
| 1        | x     | x                      | x               | -               | -                                    | SDQ winter, Background      |
| 2        | x     | x                      | x               | x               | x                                    | -                           |
| 3        | x     | x                      | x               | x               | x                                    | -                           |
| 4        | x     | x                      | x               | x               | x                                    | -                           |
| 5        | x     | x                      | x               | x               | x                                    | -                           |
| 6        | x     | x                      | x               | x               | x                                    | -                           |
| 7        | x     | x                      | x               | x               | x                                    | -                           |
| 8        | x     | x                      | x               | x               | x                                    | -                           |
| 9        | x     | x                      | x               | x               | x                                    | -                           |
| 10       | x     | x                      | -               | -               | x                                    | SDQ winter, SDQ spring      |
| 11       | x     | x                      | x               | x               | x                                    | -                           |
| 12       | x     | x                      | x               | x               | x                                    | -                           |
| 13       | x     | x                      | x               | x               | x                                    | -                           |
| 14       | x     | x                      | x               | x               | x                                    | -                           |
| 15       | x     | x                      | x               | x               | x                                    | -                           |
| 16       | x     | x                      | x               | x               | x                                    | -                           |
| 17       | -     | -                      | x               | x               | -                                    | KINDL, pandemic, Background |
| 18       | x     | x                      | x               | x               | x                                    | -                           |
| 19       | x     | x                      | x               | x               | x                                    | -                           |
| 20       | x     | x                      | x               | x               | x                                    | -                           |
| 21       | x     | x                      | x               | x               | x                                    | -                           |
| 22       | x     | x                      | x               | -               | -                                    | SDQ winter, Background      |
| 23       | x     | x                      | x               | x               | x                                    | -                           |
| 24       | x     | x                      | x               | x               | x                                    | -                           |
| 25       | x     | x                      | x               | x               | x                                    | -                           |
| Total    | 24    | 24                     | 24              | 22              | 22                                   |                             |
